# Supplementary material for: Kinetic study of the methoxycarbonylation of 1,5-pentanediamine with dimethyl carbonate using sodium methoxide catalyst
Source: Research Square preprint supplement (doi:10.21203/rs.3.rs-7967279/v1), 2025-11-21
Supplement: Supplementary file 1 [file 17f7ba6e50557d8d77b3a4c7.docx]

**Supplementary Information**

**Kinetic study of the methoxycarbonylation of 1,5-pentanediamine with dimethyl carbonate using sodium methoxide catalyst**

**Qing Zhang1 **· Xinyu Du1** **· Guirong Wang1** **· Yanji Wang1,2*****

1 Hebei Provincial Key Laboratory of Green Chemical Technology and High Efficient Energy Saving, School of Chemical Engineering and Technology, Hebei University of Technology,Tianjin 300130, China

2 Tianjin Key Laboratory of Chemical Process Safety, Tianjin 300130, China

*Corresponding author. E-mail: yjwang@hebut.edu.cn


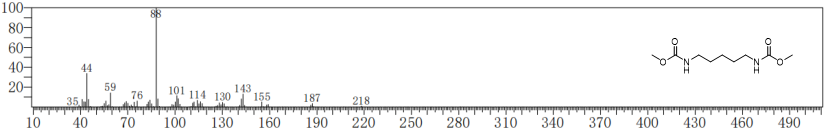


**Fig. S1** GC-MS spectra of pentamethylene-1,5-dicarbamate (PDC)


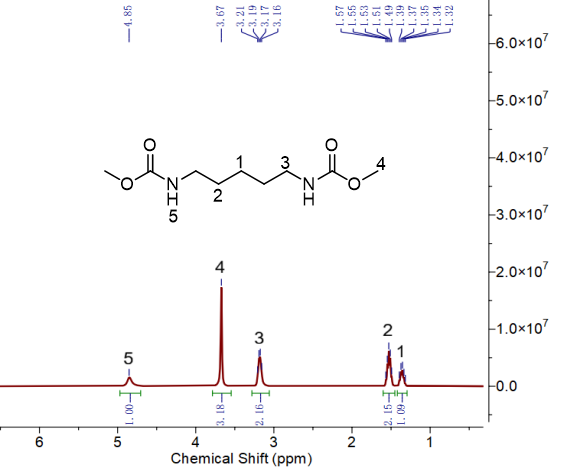


**Fig. S2** NMR hydrogen spectra of pentamethylene-1,5-dicarbamate (PDC)


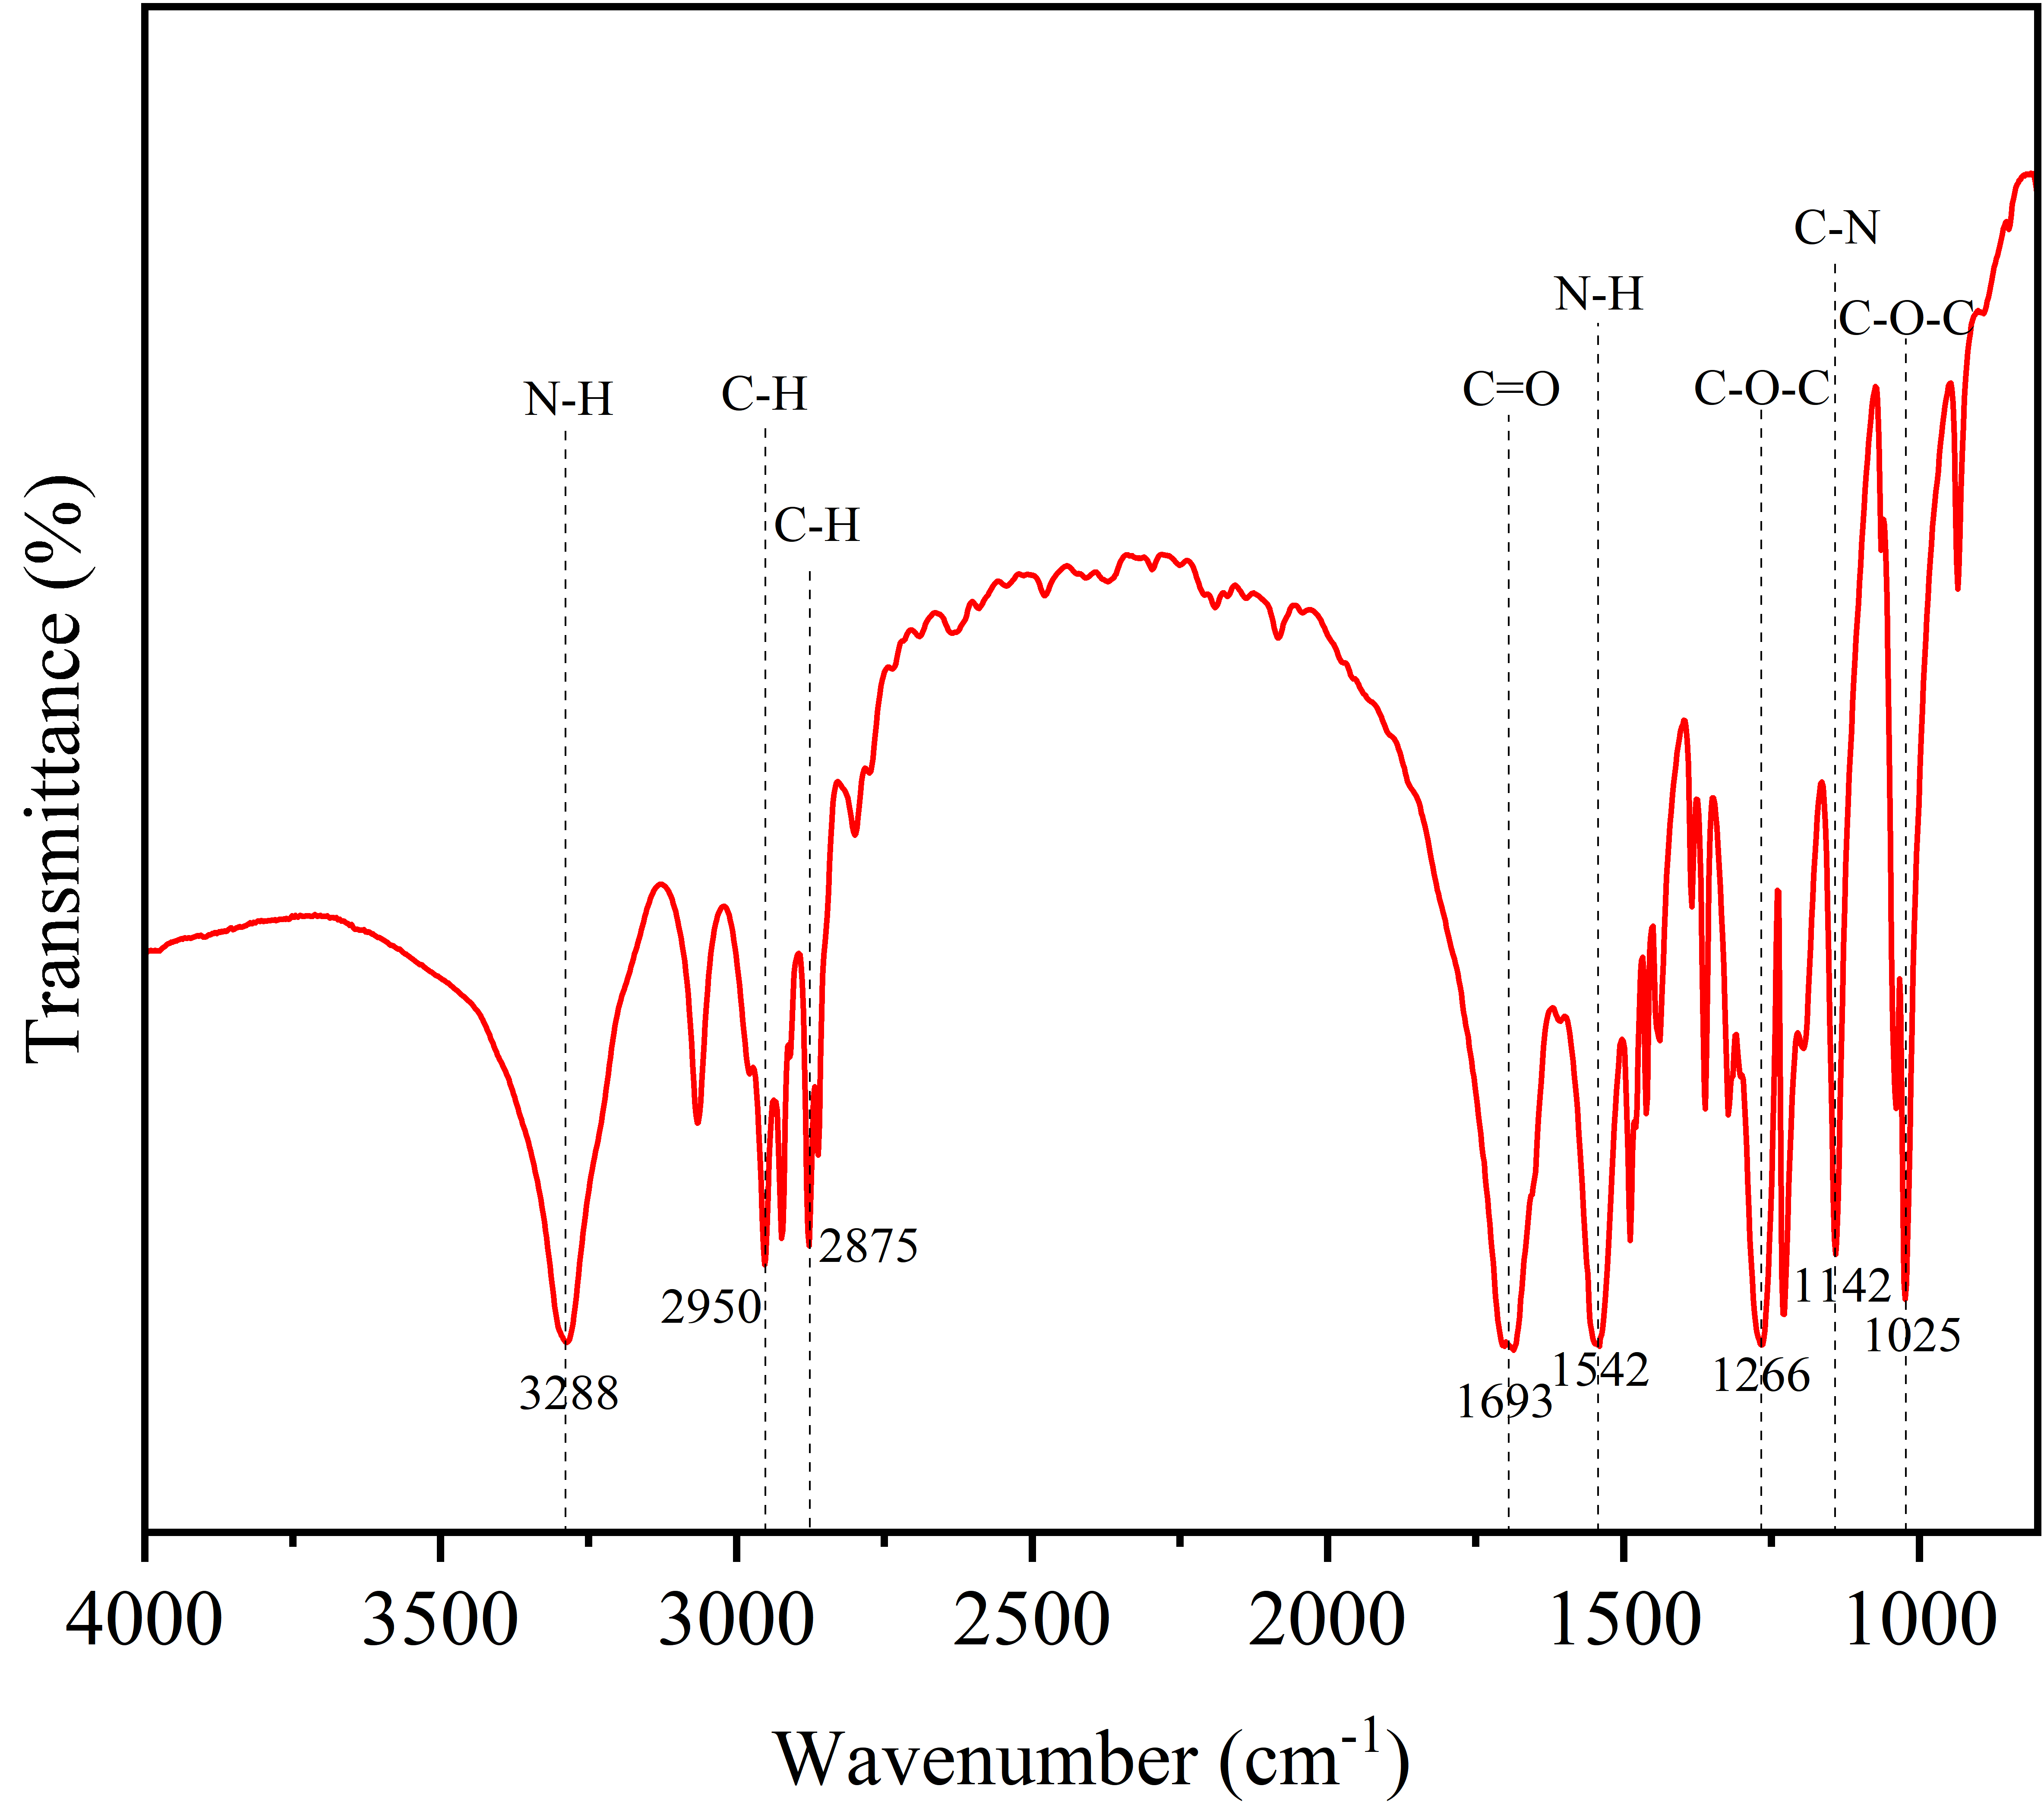


**Fig. S3** FT-IR spectra of pentamethylene-1,5-dicarbamate (PDC)
